# Supplementary material for: Effect of the ZnO/SiO2 ratio on the structure and catalytic activity of Cu/SiO2 and Cu/ZnO catalysts in water-containing ester hydrogenation
Source: Royal Society of Chemistry journal article supplement (doi:10.1039/d0nj03201h), 2020-01-01
Supplement: d0nj03201h1.pdf [file d0nj03201h1.pdf]

**Effect of ZnO/SiO<sub>2</sub> ratio on structure and catalytic activity of Cu/SiO<sub>2</sub>  
and Cu/ZnO catalyst in water-containing ester hydrogenation**

Zheng Chen, \*,<sup>a</sup> Shuwei Wei,<sup>a</sup> Xueying Zhao,<sup>a</sup> Dengfeng Wang<sup>a</sup> and Jiangang Chen \*,<sup>b</sup>

<sup>a</sup> College of Chemistry, Chemical Engineering and Materials Science, Zaozhuang University, Zaozhuang 277160, Shandong, China.

<sup>b</sup> State Key Laboratory of Coal Conversion, Institute of Coal Chemistry, Chinese Academy of Sciences, Taiyuan 030001, Shanxi, China.

**Corresponding author:**

Dr. Zheng Chen

E-mail: chenzhengtt@163.com

Prof. Jiangang Chen

E-mail: chenjg@sxicc.ac.cn

## 1.1. Hydrogenation of ester reaction

The effect of water on hydrogenation performance of Cu/SiO<sub>2</sub> and Cu/ZnO catalysts were studied by hydrogenation of ethyl acetate. The performance of Cu/SiO<sub>2</sub> and Cu/ZnO catalysts were performed on a continuous flow unit equipped with vertical stainless steel tubular reactor. The H<sub>2</sub> flow was controlled by Brooks 5850E mass flow controller (MFC). The pressure was always maintained at 2.5 MPa via a back pressure regulator, during the whole evaluation period. After in situ reduction at 300 °C (1°C/min) for 4 h with a H<sub>2</sub> flow rate of 30 ml min<sup>-1</sup>, the catalysts were cooled to room temperature. Then, the fixed bed reactor was heated to needed temperature at steps of 1 °C min<sup>-1</sup>. The liquid reactant (mass ratio: AcOEt / H<sub>2</sub>O / EtOH = 91 / 5 / 4) was injected by double-plunger pump, enabling a tunable liquid hourly space velocity (LHSV). After vaporizing by a preheater, the vapor was mixed with H<sub>2</sub>. The reaction products were collected in a 5 °C cooling cool trap and analysed by gas chromatography (Shimadzu GC-14C) using a capillary column (19091n-213, HP-INNOWAX, 0.25 mm × 30 m) with FID and a packed column (TDX-101) with TCD as the detectors. The gas products were analysed by online gas chromatographs (Shanghai Haixin GC-950) with a packed column filled with carbon molecular sieve.

## 1.2. Characterization

The powder X-ray diffraction (XRD) pattern of the prepared catalysts was

recorded on a Shimadzu XRD-6000 diffractometer using Cu K $\alpha$  radiation ( $\lambda=1.5418\text{\AA}$ ) in the  $2\theta$  scanning range between  $5^\circ$  and  $85^\circ$ . The dispersion and specific surface area of Cu $^0$  ( $D_{\text{Cu}^0}$  and  $S_{\text{Cu}^0}$ ) were measured by one-pulse N $_2$ O oxidation at  $50^\circ\text{C}$ . For more details could be found from the below. Fourier transform infrared (FT-IR) spectra was performed in transmission mode from  $4000\text{-}500\text{ cm}^{-1}$  using a Bruker Vector 22 spectrometer equipped with a DTGS detector and a KBr beam splitter. Then, the TPR experiments were performed as follows: the fresh catalysts (20 mg) were placed in a quartz reactor and were reduced by a 5% H $_2$ /N $_2$  gas mixture with a flow rate of  $50\text{ ml min}^{-1}$ , ramping at  $10^\circ\text{C min}^{-1}$  to the final temperature. Meanwhile, hydrogen consumption was recorded using a thermal conductivity detector (TCD). The morphology of the samples were characterized by means of a high-resolution transmission electron microscope (HRTEM, JEM 2100F). The X-ray photoelectron spectroscopy (XPS, AXIS ULTRA DLD) was carried out to analyze elemental valance of surface.

### **N $_2$ O-H $_2$ redox titration procedure**

The number of surface metallic copper sites was determined by dissociative N $_2$ O adsorption at  $50^\circ\text{C}$ .<sup>1-2</sup> Catalysts were first reduced by a 5% H $_2$ /N $_2$  gas mixture with a flow rate of  $50\text{ ml min}^{-1}$ , ramping at  $5^\circ\text{C min}^{-1}$  to  $350^\circ\text{C}$  for 4 h. The amount of hydrogen consumption in first TPR was denoted as X. And then, the catalyst bed was purged with Ar and cooled to  $50^\circ\text{C}$ . Surface copper atoms were oxidized in a N $_2$ O ( $50\text{ mL/min}$ ) at  $50^\circ\text{C}$  for 0.5 h. Finally, samples were flushed with 5% H $_2$ /N $_2$  to remove

the oxidant for 1 h and then to start another TPR run. Hydrogen consumption in the second TPR was denoted as Y.

The dispersion of Cu and exposed Cu surface area are calculated on the equations reported by Van Der Grift et al. <sup>1</sup>

All copper atoms were reduced in the first TPR:

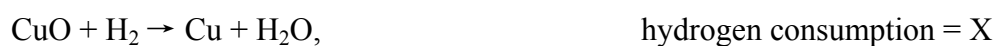

Surface copper atoms that were oxidized to Cu<sub>2</sub>O by N<sub>2</sub>O at 50 °C were reduced in the second TPR:

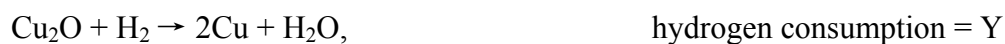

And the dispersion of Cu and exposed Cu surface area were calculated as:

$$D = (2 Y / X) \times 100\% ; S = 1353 \times Y / X (\text{m}^2 \text{ Cu} / \text{g Cu}); d_{\text{v.s. Cu}}^0 = 0.5 X / Y (\text{nm})$$

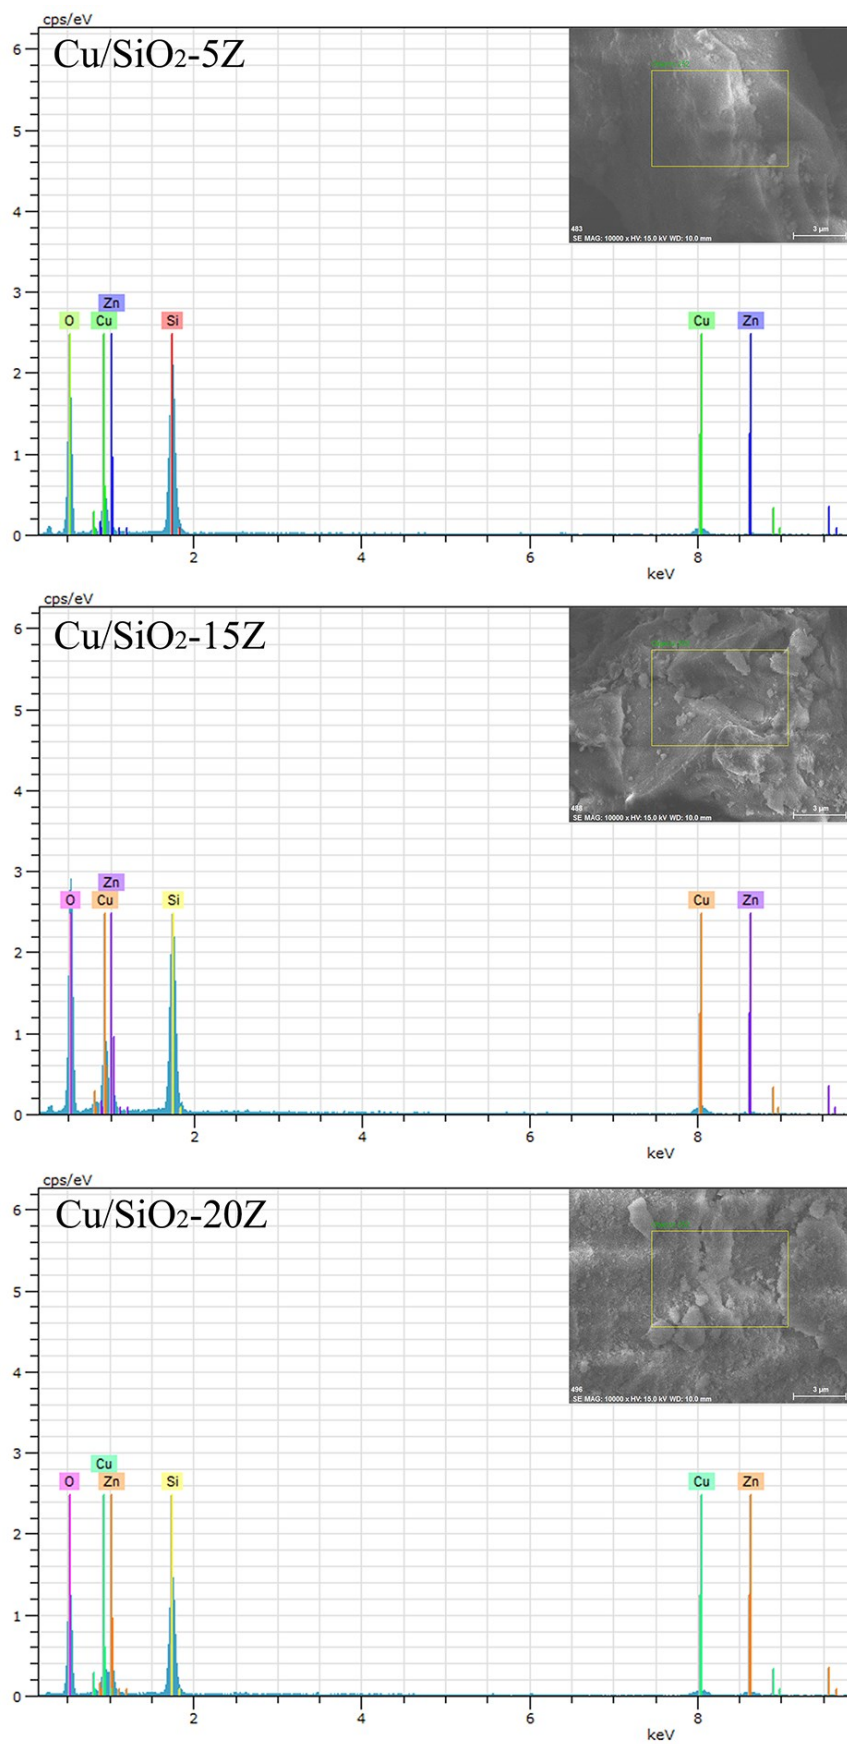

**Figure S1.** SEM-EDS images of Cu/SiO<sub>2</sub> catalysts with different ZnO contents.

**Table S1.** Metal contents of Cu/SiO<sub>2</sub> catalysts with different ZnO content measured by SEM-EDS.

| Sample    | Cu/SiO <sub>2</sub> -5Z | Cu/SiO <sub>2</sub> -10Z | Cu/SiO <sub>2</sub> -20Z |
|-----------|-------------------------|--------------------------|--------------------------|
| Cu wt. %  | 24.48                   | 24.48                    | 17.74                    |
| ZnO wt. % | 4.7                     | 8.7                      | 21.6                     |

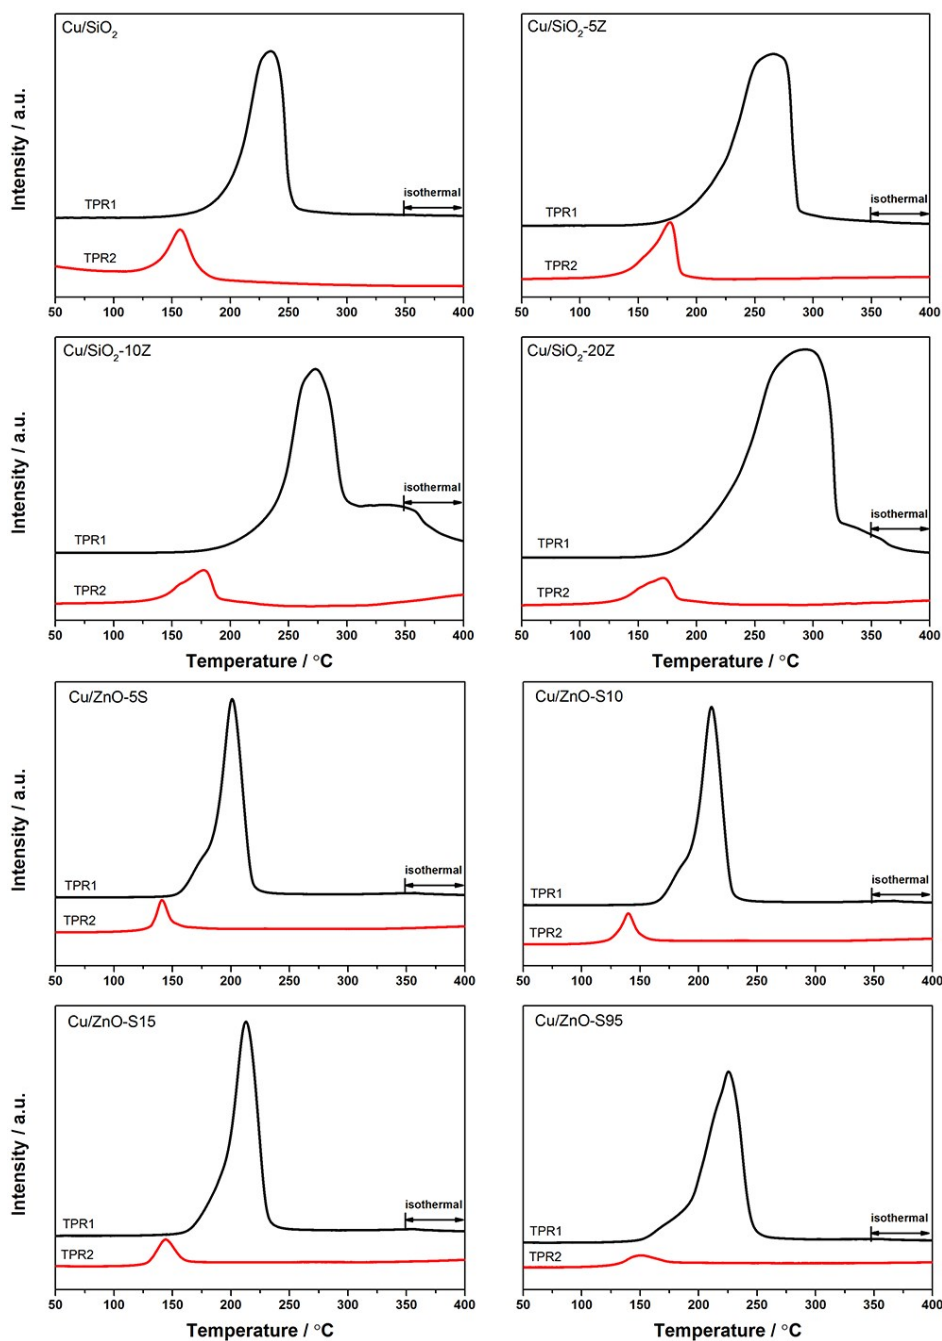

**Figure S2.** TPR profiles of Cu/SiO<sub>2</sub> catalysts with different ZnO content and Cu/ZnO catalysts with different SiO<sub>2</sub> content before and after N<sub>2</sub>O oxidation at 50 °C.

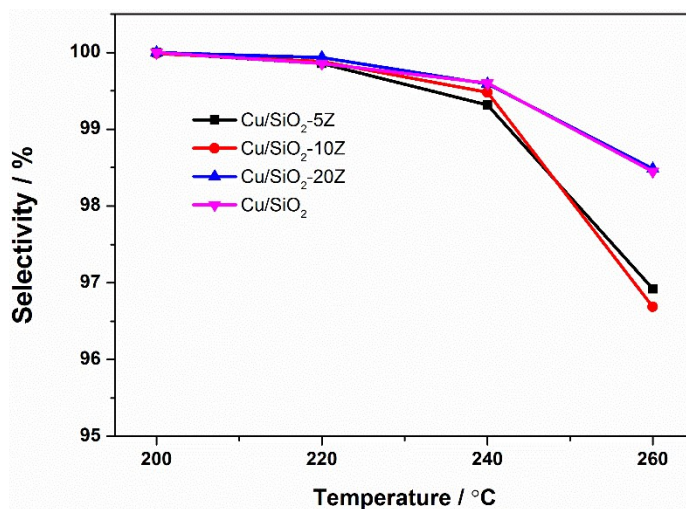

**Figure S3.** The change of selectivity of ethanol with the increased of reaction temperature for Cu/SiO<sub>2</sub> catalysts with different ZnO content. Reaction condition: P = 2.5 MPa, n(H<sub>2</sub>) / n(AcOEt) = 40 (molar ratio), LHSV of AcOEt = 1h<sup>-1</sup> and the AcOEt contained 5 wt.% water.

## References

- (1) Van Der Grift, C. J. G.; Wielers, A. F. H.; Jogh, B. P. J.; Van Beunum, J.; De Boer, M.; Versluijs-Helder, M.; Geus, J. W. Effect of the reduction treatment on the structure and reactivity of silica-supported copper particles. *J. Catal.* **1991**, *131*, 178.
- (2) Yuan, Z.; Wang, L.; Wang, J.; Xia, S.; Chen, P.; Hou, Z.; Zheng, X. Hydrogenolysis of glycerol over homogenously dispersed copper on solid base catalysts. *Appl. Catal. B-Environ* **2011**, *101*, 431.
